# Supplementary material
Source: MDPI journal article supplement (https://www.mdpi.com/2624-7402/3/2/27)
Supplement: s1 [file s1]

Archive with 1 entries (1 files):
- agriengineering-1231087-supplementary.pdf
