# Supplementary material
Source: MDPI journal article supplement (https://www.mdpi.com/2624-7402/3/2/27)
Supplement: s1 [file s1 › agriengineering-1231087-supplementary.pdf]

**Table S1.** Economic analysis of Aashkol based jute fiber retting

| Parameters                               | Unit                 | Cost    |
|------------------------------------------|----------------------|---------|
| Purchase price of Engine                 | USD                  | 412.74  |
| Purchase price of Chassis                | USD                  | 648.58  |
| Purchase price of Aashkol                | USD                  | 1061.32 |
| Total purchase Price                     | USD                  | 2122.64 |
| Annual use of Aashkol                    | h                    | 320     |
| Effective operation time                 | h day <sup>-1</sup>  | 8       |
| Working day in a year                    | day                  | 40      |
| Economic life, L                         |                      |         |
| Economic life of chassis                 | yr                   | 7       |
| Economic life of Engine                  | yr                   | 7       |
| Economic life of Aashkol                 | yr                   | 7       |
| Machine capacity                         | t h <sup>-1</sup>    | 5       |
| Fixed cost                               |                      |         |
| Salvage value (10% P)                    | USD                  | 212.26  |
| Depreciation, D                          | USD yr <sup>-1</sup> | 272.91  |
| Interest on Investment, I, (12%)         | USD yr <sup>-1</sup> | 140.09  |
| STI (Tax, Shelter and Insurance), (2.5%) | USD yr <sup>-1</sup> | 53.07   |
| Repair and Maintenance (3.5%*P)          | USD yr <sup>-1</sup> | 74.29   |
| Total Fixed cost                         | USD yr <sup>-1</sup> | 540.36  |
| Total Fixed cost (FC)                    | USD h <sup>-1</sup>  | 1.69    |
| Variable cost                            |                      |         |
| Labour cost                              | USD h <sup>-1</sup>  | 2.36    |
| Fuel cost                                | USD h <sup>-1</sup>  | 0.92    |
| Total variable cost (VC)                 | USD h <sup>-1</sup>  | 3.28    |
| Total cost, (FC+VC)                      | USD h <sup>-1</sup>  | 4.97    |
| Extraction cost                          | USD t <sup>-1</sup>  | 0.99    |
| Service rate                             |                      |         |
| Service rate                             | USD h <sup>-1</sup>  | 154.78  |
| Service rate                             | USD t <sup>-1</sup>  | 2.06    |
| Profit                                   |                      |         |
| Profit                                   | USD t <sup>-1</sup>  | 1.07    |
| Profit                                   | USD h <sup>-1</sup>  | 5.35    |
| Payback period                           |                      |         |
| Payback period                           | yr                   | 1.24    |
